# Supplementary material for: CAMELE: Collocation-Analyzed Multi-source Ensembled Land Evapotranspiration Data
Source: Copernicus journal article supplement (doi:10.5194/essd-16-1811-2024), 2024-04-12
Supplement: Supplementary file 1 [file essd-16-1811-2024-supplement.pdf]

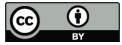

*Supplement of*

## **CAMELE: Collocation-Analyzed Multi-source Ensembled Land Evapotranspiration Data**

**Changming Li et al.**

*Correspondence to:* Hanbo Yang ([yanghanbo@tsinghua.edu.cn](mailto:yanghanbo@tsinghua.edu.cn))

The copyright of individual parts of the supplement might differ from the article licence.

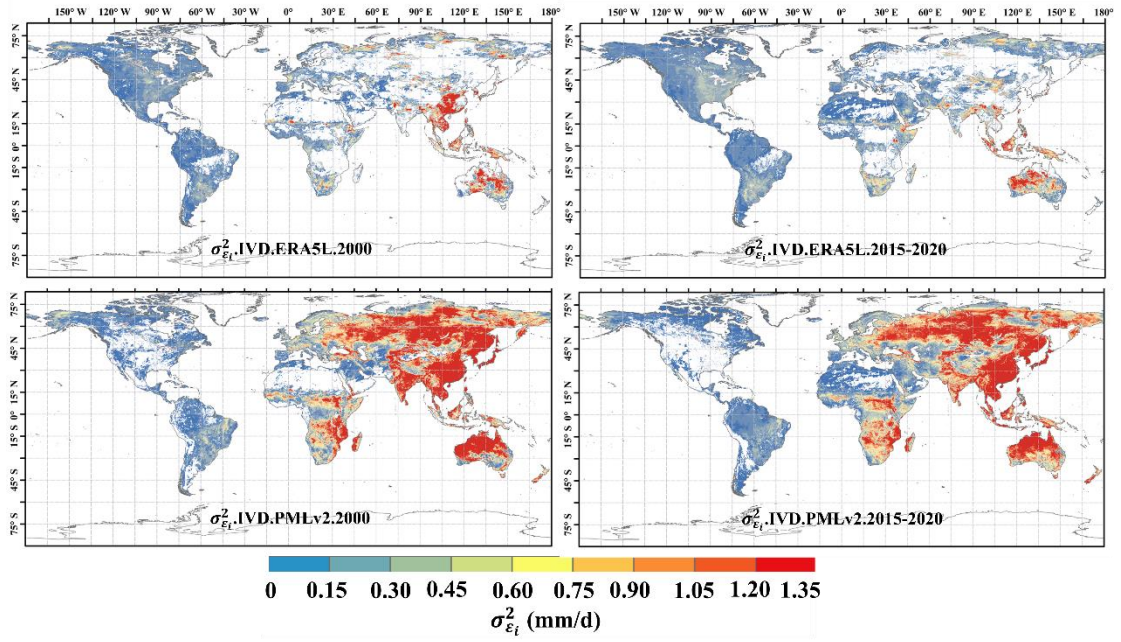

**FIGURE.S1** Global distribution of absolute error variances ( $\sigma_{\epsilon_i}^2$ ) of ERA5L and PMLv2 using IVD at a resolution of  $0.1^\circ$  during the period 2000 and 2015-2020.

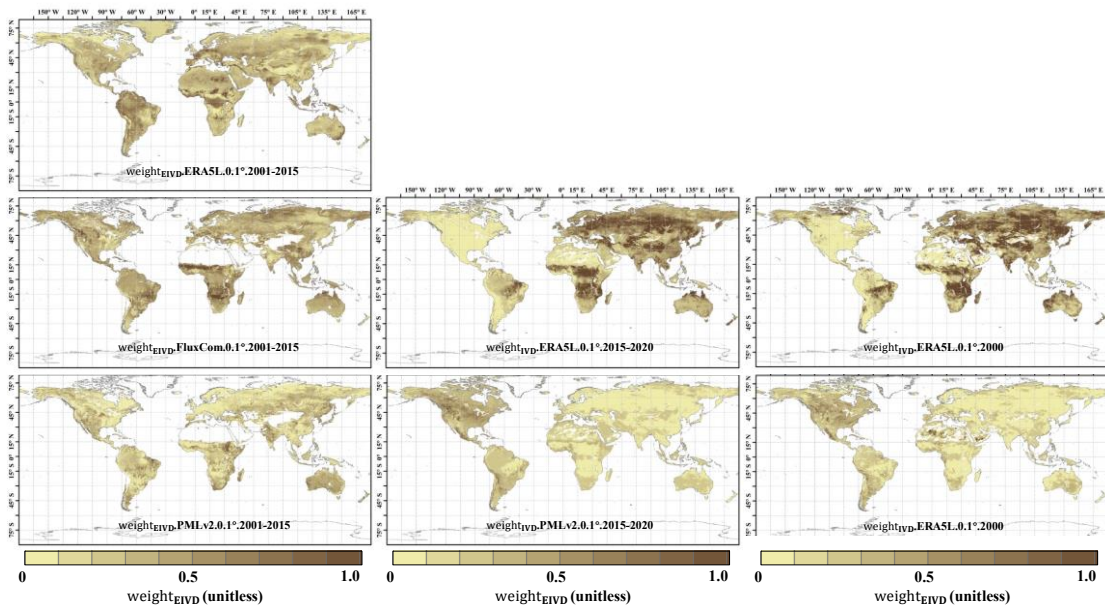

**FIGURE.S2** Global distribution of optimal weights at  $0.1^\circ$ .

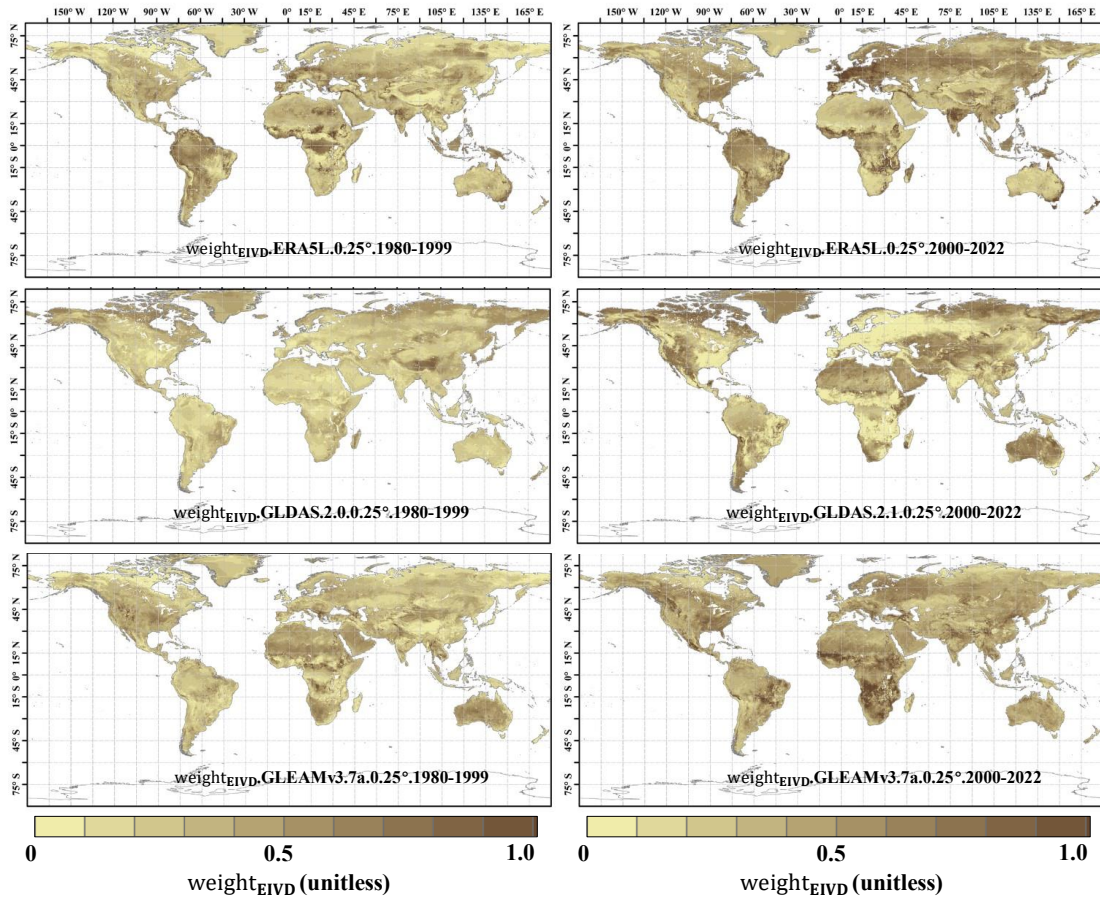

**FIGURE.S3** Global distribution of optimal weights at 0.25°.
